1 **Title: Reliability, sensitivity and predictive value of fMRI during multiple object**  
2 **tracking as a marker of cognitive training gain in combination with tDCS in stroke**  
3 **survivors**

4  
5 **Authors:** Knut K. Kolskår<sup>a,b,c,\*</sup>, Geneviève Richard<sup>a,b,c</sup>, Dag Alnæs<sup>a</sup>, Erlend S.Dørum<sup>a,b,c</sup>,  
6 Anne-Marthe Sanders<sup>a,b,c</sup>, Kristine M. Ulrichsen<sup>a,b,c</sup>, Jennifer Monereo Sánchez<sup>a</sup>, Hege Ihle-  
7 Hansen<sup>d</sup>, Jan E. Nordvik<sup>e</sup>, Lars T. Westlye<sup>a,c,f\*</sup>

8  
9 <sup>a</sup> NORMENT, Division of Mental Health and Addiction, Oslo University Hospital & Institute  
10 of Clinical Medicine, University of Oslo, Norway

11 <sup>b</sup> Sunnaas Rehabilitation Hospital HT, Nesodden, Norway

12 <sup>c</sup> Department of Psychology, University of Oslo, Norway

13 <sup>d</sup> Department of Geriatric Medicine, Oslo University Hospital, Oslo, Norway

14 <sup>e</sup> Catosenteret Rehabilitation Center, Son, Norway

15 <sup>f</sup> KG Jebsen Centre for Neurodevelopmental Disorders, University of Oslo, Norway

16  
17 \* Corresponding authors: Knut K. Kolskår (kolskaar@gmail.com, +47 995 97 425) & Lars T.  
18 Westlye (l.t.westlye@psykologi.uio.no), Department of Psychology, University of Oslo, Pb.  
19 1094, Blindern, 0317 OSLO, Norway, phone: +47 22845000, Fax: +47 22845001

20  
21 Acknowledgements: This work was supported by the South-Eastern Norway Regional Health  
22 Authority (2014097, 2015044, 2015073), the Norwegian ExtraFoundation for Health and  
23 Rehabilitation (2015/FO5146), the Research Council of Norway (249795, 262372) and the  
24 European Research Council under the European Union's Horizon 2020 research and  
25 Innovation program (ERC StG, Grant 802998).

26

27 Data availability: The data that support the findings of this study are openly available in  
28 <https://osf.io/ndpuz/>, at DOI 10.17605/OSF.IO/NDPUZ

29

30 Conflict of Interest: We declare no competing financial interests. We obtained appropriate  
31 ethical approval from the local ethics committee, and all procedures were in line with the  
32 declaration of Helsinki. Relevant data have been made available at [osf.io](https://osf.io/):

33 <https://osf.io/ndpuz/>.

34

35 Keywords: stroke, rehabilitation, fMRI, cognitive training, tDCS

36

37

38

39

40

41

42

43

44

45

46

47

48

49

50

51

52

53 **Abstract**

54 Computerized cognitive training (CCT) combined with transcranial direct current stimulation  
55 (tDCS) has showed some promise in alleviating cognitive impairments in patients with brain  
56 disorders, but the robustness and possible mechanisms are unclear. In this prospective double-  
57 blind randomized clinical trial, we investigated the feasibility and effectiveness of combining  
58 CCT and tDCS, and tested the predictive value of and training-related changes in fMRI-based  
59 brain activation during attentive performance (multiple object tracking) obtained before,  
60 during and after the three-weeks intervention in chronic stroke patients (> 6 months since  
61 hospital admission). Patients were randomized to one of two groups, receiving CCT and  
62 either (1) tDCS targeting left dorsolateral prefrontal cortex (1 mA), or (2) sham tDCS, with  
63 40s active stimulation (1 mA) before fade out of the current. 77 patients were enrolled in the  
64 study, 54 completed the cognitive training, and 48 completed all training and MRI sessions.  
65 We found significant improvement in performance across all trained tasks, but no additional  
66 gain of tDCS. fMRI-based brain activation showed high reliability, and higher cognitive  
67 performance was associated with increased tracking-related activation in the dorsal attention  
68 network (DAN) and default mode network (DMN) as well as anterior cingulate after  
69 compared to before the intervention. We found no significant associations between cognitive  
70 gain and brain activation measured before training or in the difference in activation after  
71 intervention. Combined, these results show significant training effects on trained cognitive  
72 tasks in stroke survivors, with no clear evidence of additional gain of concurrent tDCS.

73

74

75

76

77

78

79 **Introduction**

80 While stroke mortality has decreased during the last decades in western countries, it remains a  
81 leading cause of disabilities (Feigin et al., 2017), and many stroke survivors experience  
82 persistent cognitive sequelae. Indeed, prevalence of neurocognitive disorders in post stroke  
83 survivors have been reported to as high as 54% (Barbay et al., 2018), and may increase risk of  
84 dementia (Pendlebury, 2012). Reduced working memory capacity is among the most common  
85 impairments (Teasell, 1992; Zinn et al., 2007), with high prevalence at the chronic stage  
86 (Mahon et al., 2017; Schaapsmeeders et al., 2013), and potentially large impact on daily  
87 functioning (Synhaeve et al., 2014). Stroke lesions influence brain activation as measured  
88 using brain imaging (Altamura et al., 2009), and working memory deficits have been linked to  
89 aberrant brain activation during task engagement (Ziemus et al., 2007).

90 Computerized cognitive training (CCT) has shown some promise in augmenting  
91 cognitive rehabilitation. A recent meta-analysis revealed small but significant improvements  
92 on cognitive functioning in response to CCT in healthy participants (Au et al., 2015). Similar  
93 findings have been reported in patients with Parkinson's disease (Leung et al., 2015), mild  
94 cognitive impairment (Maffei et al., 2017), brain injury (Weicker et al., 2016), and stroke (De  
95 Luca et al., 2018b; Peers et al., 2018), as well as schizophrenia (Priksen et al., 2018) and  
96 major depression (Motter et al., 2016). However, the underlying mechanisms remain elusive.

97 Furthermore, non-invasive electrical stimulation of the brain has been suggested to  
98 augment training benefits (Kang et al., 2015; Marquez et al., 2015). Indeed, evidence suggests  
99 amplified motor recovery post-stroke, when physical therapy is paired with transcranial direct  
100 current stimulation (tDCS) (Kang et al., 2015), and the beneficial effects have been suggested  
101 to generalize to a cognitive rehabilitation context (Andrews et al., 2011; Fregni et al., 2005;  
102 Lawrence et al., 2018). Despite some positive findings, the overall effectiveness of tDCS has  
103 been questioned (Medina and Cason, 2017). Also, the potential mechanisms, if any, are

104 unclear, yet enhancing neuronal excitability by lowering the membrane-potential has been  
105 suggested as one of the candidate means (Giordano et al., 2017).

106         Functional MRI has become an increasingly used non-invasive brain imaging method  
107 linking behavior to brain activation patterns. Studies investigating alterations in brain  
108 activation in response to CCT have reported mixed results. In healthy controls, training gains  
109 have been associated with decreased activity in medial and dorsal frontal areas, including  
110 anterior cingulate (Heinzel et al., 2016; Miró-Padilla et al., 2018; Motes et al., 2018), with  
111 increased efficiency reflected in lowered activity as a suggested cognitive mechanism  
112 (Constantinidis and Klingberg, 2016). For patient cohorts the current evidence is sparser, but  
113 increased activity in frontal and parietal areas in response to cognitive training has been  
114 reported in patients with schizophrenia (Haut et al., 2010; Ramsay and MacDonald, 2015;  
115 Subramaniam et al., 2014). In stroke patients, CCT has been associated with increased  
116 functional connectivity (FC) between hippocampus, frontal and parietal areas, which was  
117 associated with improved cognitive performance (Lin et al., 2014; Yang et al., 2014).

118         Despite some promising findings, the effects of CCT (Buitenweg et al., 2018; De Luca  
119 et al., 2018a; Melby-Lervåg and Hulme, 2013; Melby-Lervåg et al., 2016) and tDCS  
120 (Dedoncker et al., 2016; Hill et al., 2016) are still unclear. More knowledge about the origins  
121 of individual differences in training gains is key to evaluate and improve selection to fully  
122 realize the clinical potential of these interventions. Investigations of the neural underpinnings  
123 of cognitive improvement in response to CCT and tDCS may help clarify the benefits and  
124 limitations for future clinical application. It is therefore key to better understand mechanisms  
125 besides behavioral transfer-effects before evaluating the full effect of these programs.

126         To this end, we investigated differences in training-related gains of a commonly used  
127 working memory computerized training program in combination with tDCS, and tested the  
128 predictive value and sensitivity of fMRI-based brain activation as a marker for training-  
129 related gain in task performance. Specifically, we estimated activation patterns during

130 multiple object tracking (MOT) at baseline, before initiating training (on average 4 weeks  
131 after baseline measure), and after a three-week intervention. The multiple object tracking  
132 (MOT) task offers a promising tool for assessing and manipulate converging activation  
133 patterns across attention and working memory tasks in both healthy controls and stroke  
134 patients (Dørum et al., 2016; Pylyshyn and Strom, 1988; Walle et al., 2019). MOT robustly  
135 recruit brain areas (Alnæs et al., 2014) comparable with activations associated with Cogmed  
136 training (Olesen et al., 2004), including canonical task-positive and task-negative brain  
137 networks. To assess specific associations with tDCS and following a double-blind design, in  
138 addition to CCT each participant was pseudo-randomized into two groups: 50% (n=27)  
139 receiving active tDCS directed towards the left dorsolateral prefrontal cortex and 50% (n=27)  
140 receiving sham stimulation.

141 We tested the following hypotheses: (1) Variability in cognitive training gain is  
142 reflected in differential slopes of increased performance across participants, (2) level of  
143 improvement is affected by tDCS stimulation protocol, (3) fMRI-based brain activation  
144 patterns prior to training are predictive of training gain, and (4) individual differences in task  
145 improvement are reflected in differential patterns of brain activation after the three-weeks  
146 intervention, in particular involving frontal and parietal brain regions.

147

## 148 **Methods**

### 149 *Sample and exclusion criteria*

150 Figure 1 depicts the study recruitment pipeline. Participants were recruited from two major  
151 hospitals located in Oslo, Norway (Stroke unit at Oslo University hospital, and Geriatric  
152 department at Diakonhjemmet Hospital, Oslo, Norway). Hospital staff identified suitable  
153 participants. Inclusion criterion was identifiable stroke with ischemic or hemorrhagic  
154 etiology. Patients with transient ischemic attacks (TIA) were not included. Exclusion criteria

155 included MRI contraindications, other neurological diseases diagnosed prior to the stroke,  
156 severe psychiatric diagnosis including bipolar disorder, schizophrenia or drug abuse.  
157 Approximately 900 invitations were sent out, and 250 responded; among those, 77 patients  
158 were eligible for participation and were initially included in the study (Ulrichsen et al., 2019).  
159 19 participants withdrew from the study prior to (n=14) or during (n=5) the cognitive training  
160 due to the labor-intensity of the intervention. Four participants were excluded during the  
161 course of the intervention due to newly occurring medical issues violating the inclusion  
162 criteria. Two participants were included without radiological findings when admitted to the  
163 stroke unit, but displayed neurological symptoms. Initial MRI diffusion weighted imaging  
164 revealed possible acute infarctions and the patients were treated with thrombolysis.  
165 Subsequent T2-weighted imaging revealed no certain radiological findings, but symptoms  
166 persisted upon discharge and they were diagnosed by a neurologist with ICD-10 code I63.9  
167 Cerebral infarction, and therefore included. In total, 54 participants completed the cognitive  
168 training program. For timepoint 1, one participant had corrupted behavioral data and two  
169 participants were not able to complete the task during the fMRI assessment, and were  
170 excluded from all MRI analysis. For MRI timepoint 2 and 3, one participant had poor  
171 alignment to the MNI-template, and two participants were not able to complete the task,  
172 yielding a total of 51 participants at baseline and 48 with full MRI at all timepoints. In this  
173 final sample, 26 participants received active stimulation, and 22 received sham stimulation.

174         The study was approved by the Regional Committee for Medical and Health Research  
175 Ethics South-East Norway (2014/694; 2015/1282), and all participants provided written  
176 informed consent.

177

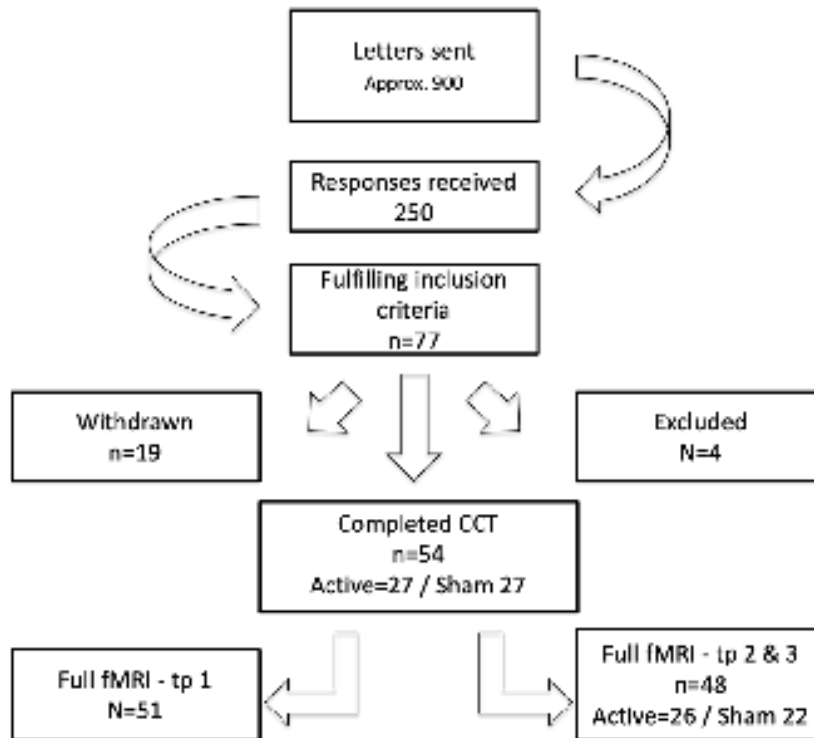

178  
179  
180

**Figure 1.** Flowchart displaying inclusion pipeline

181

182

### 183 *Patient characteristics and lesion demarcation*

184 Sample characteristics for the participants completing the intervention (n=54) are described in  
185 Table 1, including National Institutes of Health Stroke Scale (NIHSS) (Goldstein et al., 1989),  
186 Trial of Org 10172 in Acute Stroke Treatment (TOAST) (Adams et al., 1993), Mini-Mental  
187 State Exam (MMSE) (Strobel and Engedal, 2008) and IQ derived from Wechsler Abbreviated  
188 Scale of Intelligence (WASI) (Ørbeck and Sundet, 2007). Briefly, the sample mean age was  
189 69 years (sd=7.3), comprised 74% males, and average IQ of 110 (sd=16). Two sample t-tests  
190 revealed no significant differences between the active and sham tDCS-groups.

191 For each participant, lesion demarcation was performed by a trained assistant, utilizing  
192 the semi-automated toolbox clusterize, implemented for SPM8 (Clas et al., 2012; de Haan et  
193 al., 2015), and guided by radiological descriptions. Figure 2 displays a probabilistic lesion  
194 map across participants. Supplementary Figure 1 provides an overview of individual lesions.



195

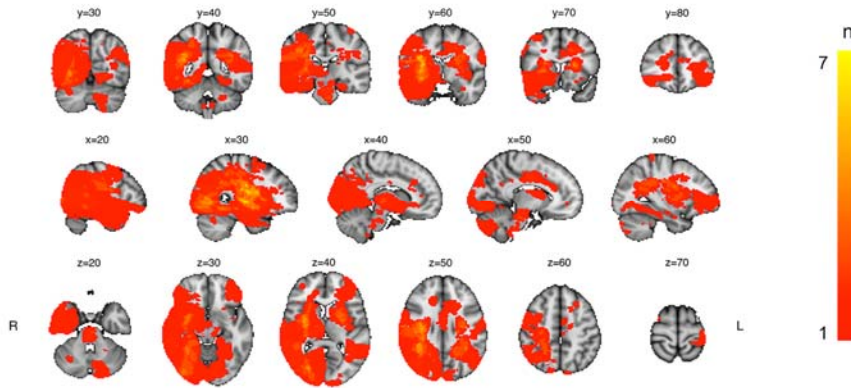

196  
197  
198  
199

**Figure 2.** Heatmap displaying lesion overlap across included participants. The color scale reflects the number of overlapping lesions in each voxel (ranging from 0 to 7).

|                                                  | Mean                      | sd     | Min | Max | tDCS grouping t/p    |
|--------------------------------------------------|---------------------------|--------|-----|-----|----------------------|
| <b>Participant descriptives (current)</b>        |                           |        |     |     |                      |
| Age at inclusion                                 | 69.13                     | 7.374  | 47  | 81  | <b>0.11 / 0.907</b>  |
| Males (%)                                        | 74.07                     | -      |     |     | <b>23 / 17 males</b> |
| Time between stroke and inclusion (months)       | 25.74                     | 9.17   | 6   | 45  | <b>0.36 / 0.720</b>  |
| Self-reported education in years                 | 14.39                     | 3.71   | 9   | 30  | <b>-0.59 / 0.559</b> |
| MMSE at inclusion                                | 27.98                     | 1.855  | 22  | 30  | <b>0.81 / 0.419</b>  |
| IQ                                               | 110.45                    | 16.906 | 66  | 136 | <b>-0.41 / 0.687</b> |
| Days between inclusion and training              | 33.78                     | 12.986 | 19  | 74  | <b>0.82 / 0.419</b>  |
| Days between MRI assessment pre/post training    | 31.72                     | 6.257  | 19  | 49  | <b>1.99 / 0.052</b>  |
| <b>Clinical variables during hospitalization</b> |                           |        |     |     |                      |
| NIHSS at discharge                               | 1.33                      | 1.53   | 0   | 7   |                      |
| TOAST classification                             | Large vessel disease n=20 |        |     |     |                      |
|                                                  | Small vessel disease n=18 |        |     |     |                      |
|                                                  | Cardioembolic disease n=6 |        |     |     |                      |
|                                                  | Other n=10                |        |     |     |                      |

200 Table 1. Sample characteristics. Two-sample t-tests did not reveal any significant differences  
201 between the active and sham group regarding participant characteristics  
202

203 *Study protocol*

204 The protocol have previously been described in detail (Richard et al., 2020). Briefly, after  
205 inclusion the participants completed MRI assessment at three timepoints: timepoint 1, at  
206 timepoint 2 on average 3-4 weeks after timepoint 1 without additional contact to enable a  
207 double baseline for comparison, and at timepoint 3, after the participant completed the  
208 training protocol.

209

### 210 *Cognitive training*

211 The patients performed a computerized working memory training program (Cogmed QM,  
212 Cogmed Systems AB, Stockholm, Sweden), comprising 12 auditory-verbal and visual-spatial  
213 working memory tasks. The implementation of the protocol has previously been reported in  
214 detail (Richard et al., 2020). Briefly, the training comprised five weekly training sessions over  
215 3-4 weeks, with 17 training sessions for each participant in total. Each participant completed  
216 two weekly tDCS stimulation sessions at the hospital, with a total of 6 tDCS sessions with a  
217 minimum of 48 hours between each stimulation. The remaining Cogmed sessions was  
218 completed at home. Level of Cogmed task difficulty was automatically adjusted according to  
219 each participant's performance level. The initial two first sessions for each task was discarded  
220 from statistical analysis to ensure each participant was at a desired level of difficulty. The  
221 same task setup was used for all participants, and tasks completed three times or less over the  
222 course of training were excluded. Eight Cogmed subtests were included in further analysis,  
223 including Grid, Cube, Digits, Hidden objects, Sort, Rotation, Twist, and 3D-cube.

224

### 225 *tDCS*

226 Participants were randomly assigned to either active or sham condition, using codes provided  
227 by the manufacturer and implemented by an in-house Matlab script, pseudo-randomizing  
228 participants while maintaining balance in groups of 20. tDCS stimulation was applied at six  
229 occasions for each participant, with a minimum of 48 hours between stimulations, aiming at

230 an average of two stimulations per week. Stimulation current was 1000  $\mu\text{A}$ , stimulation time  
231 was 20 minutes for the active group with a ramp-up time of 120 seconds and fade-out time of  
232 30s. The current intensity was limited to 1mA to limit the risk of adverse events due to the  
233 electrical stimulation. The sham stimulation consisted of ramp-up followed by 40 seconds of  
234 active stimulation and then fade-out, following factory settings. Stimulation was delivered via  
235 a battery-driven direct current stimulator (neuroConn DC stimulator plus, Germany), through  
236 5 x 7 cm rubber pads, yielding a 28.57  $\mu\text{A}/\text{cm}^2$  current density at skin surface. Impedance  
237 threshold at start-up of stimulation was  $< 20 \text{ k}\Omega$ , and was regulated by the device with an  
238 absolute threshold at 40  $\text{k}\Omega$  for automatically terminating stimulation. The pads were covered  
239 with high-conductive gel (Abralyt HiCl, Falk Minow Services Herrsching, Germany) to  
240 enhance conductance.

241 Electrode location was determined by following the 10-20 system, where the anodal  
242 electrode was located at F3 corresponding to left DLPFC and cathodal at O2 corresponding to  
243 right occipital/cerebellum, and fixated with rubber bands.

244

#### 245 *fMRI task*

246 Participants performed a blocked version of the MOT (Pylyshyn and Storm, 1988), as  
247 previously described in detail (Alnæs et al., 2015b). Briefly, the participants were presented  
248 with ten identical circles on a grey background. All objects were initially blue, before zero  
249 (passive viewing), one (load 1) or two (load 2) of the objects turned red for 2.5 seconds,  
250 designating them as targets. After targets had returned to blue, the objects started moving  
251 randomly around the screen for 12 seconds. After the 12 second tracking period, the objects  
252 became stationary, one of the objects turned green, and the participants were instructed to  
253 respond “yes” or “no” to whether or not the green probe had been designated as a target in  
254 that trial. Participants were instructed to keep fixation on a fixation point at the center of the

255 screen during both attentive tracking and passive viewing. The task consisted of 24 semi-  
256 randomized trials in total, ensuring the same condition was not repeated consecutively.

257

### 258 *MRI acquisition*

259 MRI data was acquired with a 3T GE 750 Discovery MRI scanner (32-channel head coil)  
260 located at Oslo University Hospital. T1-weighted images was acquired using a 3D IR-  
261 prepared FSPGR (BRAVO) with the following parameters: scan time: 4:43 minutes and  
262 included 188 sagittal slices, repetition time (TR): 8.16 ms, echo time: 3.18 ms, flip angle: 12°,  
263 voxel size: 1 × 1 × 1 mm, field of view: 256 x 256 mm,

264 *Functional MRI sequences* was acquired with a BOLD-sensitive gradient echo planar  
265 sequence, with TR of 2.25 s, TE 30 ms, field of view 256 x 256 mm, slice thickness 3 mm  
266 with 0.5 mm gap acquired ascending interleaved, 90° flip angle, with R/L orientation. The  
267 initial first five volumes were removed before analysis.

268

### 269 *fMRI data processing*

270 fMRI data was processed using FMRI Expert Analysis Tool (FEAT) Version 6.00, from  
271 FMRIB's Software Library (FSL; Jenkinson et al., 2012; Smith et al., 2004), and included the  
272 following steps: correction for motion using MCFLIRT (Jenkinson et al., 2002), linear trend  
273 removal and high-pass filtering (0.01 Hz), removal of non-brain tissue using BET (Smith,  
274 2002), spatial smoothing with a Gaussian kernel of full width at half maximum (FWHM) of 6  
275 mm (SUSAN ; Smith and Brady, 1997), and linear registration using FLIRT (Jenkinson and  
276 Smith, 2001) to Montreal Neurological Institute (MNI) 152 standard space using the T1-  
277 weighted scan as an intermediate. In the same manner, normalization parameters were  
278 estimated for each participants T2-weighted image, and applied to the demarked lesion.

279

280

281 *Statistical analysis of behavioral data*

282 *Cogmed main effects of time:* To investigate the trajectory of Cogmed performance across  
283 participants and time points, linear mixed effects (lme) models were estimated for each test,  
284 using the lme function from the nlme-package (Pinheiro et al., 2017) in R (Team, 2016). Task  
285 performance was entered as dependent variable, with training session as independent variable,  
286 and age, sex, tDCS-group, educational level in years (self-reported), and interaction between  
287 training session and tDCS, as fixed factors, and participant as random factor. To assess  
288 normality in the data according to criteria for lme, we plotted distribution of random effects  
289 intercepts, see supplementary Figure 7. Visual inspection did not indicate severe violations of  
290 the criteria.

291 *Cogmed individual trajectories:* To quantify individual trajectories in Cogmed  
292 performance across the training-period, we estimated for each test and each participant a  
293 linear model with performance as dependent variable and session number as independent  
294 variable, yielding a beta-estimate (slope) for each test for each participant reflecting changes  
295 in performance over time. As a measure of overall performance for each participant, we used  
296 the average task performance across sessions for each test for each participant. To investigate  
297 task homogeneity in beta-estimates and average performance we performed multivariate  
298 outlier detection with the aq.plot function in the mvoutliers package in R (P. Filzmoser and  
299 Gschwandtner, 2018), with an alpha of 0.001 and 90% of the sample to estimate the minimum  
300 covariance determinant. Two subtests (“hidden objects” and “Digits”) were found to have a  
301 high number of outliers compared to the other subtests, and were excluded from further  
302 analysis (See Supplementary Figure 2 for details).

303 To derive a common score for average Cogmed performance and gain, we performed  
304 a principal component analysis (PCA) on beta-estimates and average performance,  
305 respectively. All scores were zero-centered and standardized prior to running the PCA. We  
306 used the first factor from the beta PCA as a *Cogmed change score*, and the first factor from

307 the average performance PCA as a *Cogmed average performance score* (see Supplementary  
308 Figure 3 for scree-plot derived from the PCA performed on both with and without the  
309 excluded tasks).

310 To explore potential association between initial cognitive capacity and Cogmed  
311 change score, we correlated performance on the cognitive performance at baseline assessed  
312 with the Cabpad battery (<https://www.cognisoft.info>) at TP1, described in detail previously  
313 (Richard et al., 2019) with the Cogmed change score. To test for associations between initial  
314 cognitive performance and response to tDCS we estimated linear models using the same  
315 baseline cognitive performance from Cabpad as the dependent variable, and Cogmed change  
316 score and tDCS group as independent variables. Models were estimated using the `lm` function  
317 in the stats package in R (Team, 2013).

318 To assess the association between Cogmed scores and lesion severity, we estimated  
319 linear models for both Cogmed change and average performance scores, using lesion volume,  
320 number of lesions and their interaction as explanatory variables. To assess impact of duration  
321 from the stroke to inclusion on gains from the training, we correlated time since injury  
322 measured in months with the Cogmed change score as well as the Cogmed average  
323 performance score.

324 *fMRI behavioral analysis:* To investigate performance during the MOT task across  
325 timepoints, linear mixed effects (lme) models were estimated for both load 1 and load 2, using  
326 the `lme` function from the `nlme`-package (Pinheiro et al., 2017) in R. Task performance was  
327 entered as dependent variable, with training session as independent variable, and participant  
328 as random factor. To assess for pairwise differences across the timepoints, post hoc analysis  
329 was performed using the `ghlt` function from the `multcomp` package (Hothorn et al., 2008) in  
330 R, and corrected for multiple comparisons using Bonferroni correction.

331

332

333 *fMRI data analysis*

334 First-level GLMs for each participant and scanning session were estimated using FEAT  
335 (Woolrich et al., 2001), including regressors for passive viewing, load 1, load 2, responses, as  
336 well as the standard and extended motion parameters estimated during preprocessing. The  
337 following contrasts were estimated: passive viewing, load 1, load 2, tracking ([load 1 + load  
338 2] – passive viewing) and load (load 2 – load 1).

339 To estimate main effects of experimental conditions across individuals, contrasts of  
340 parameter estimates (COPEs) from each participant's first scan session (baseline) were  
341 submitted to randomise (Winkler et al., 2014) performing a one sample t-test for each  
342 condition separately. Multiple comparisons were corrected for using permutation testing and  
343 threshold free cluster enhancement (TFCE (Smith and Nichols, 2009)).

344 To estimate associations with task performance with brain activation during task  
345 engagement, individual COPE maps for load 1 and load 2 were stacked separately, and  
346 submitted to randomise, including sex, age and task performance as covariates.

347 To test for differences in brain activation between scan sessions, we first performed  
348 fixed effects analysis for each participant separately, including all COPEs from first level  
349 GLM, specifying the contrasts session 3 minus session 2, session 3 minus session 1, and  
350 session 2 minus session 1. Next, all individual COPE maps were submitted to randomise to  
351 test for group-level main effects while correcting for multiple comparisons using permutation  
352 testing and threshold free cluster enhancement (TFCE).

353 To quantify within-subject reliability in brain activation across time we estimated  
354 intraclass correlation coefficient (ICC) for each voxel between assessment two and three  
355 utilizing the variance from one-way random ANOVA, for the contrasts passive viewing, load  
356 1 and load 2, as implemented in the ICCest function from the ICC R package (Wolak et al.,  
357 2012).

358 To test for associations between Cogmed change and average performance scores and  
359 brain activation, individual level COPE maps for timepoint 1 and the difference between  
360 timepoint 3 and 2 including the conditions passive viewing, load1, load 2, tracking as well as  
361 load were stacked separately and submitted to randomise. The model included sex, age, and  
362 either Cogmed change score or Cogmed average performance score (obtained from the PCA).  
363 In the same manner to explore differences associated with tDCS stimulation protocol, the  
364 same COPE's from the difference between timepoint 3 and 2 including all conditions were  
365 submitted to randomise, with the model including sex, age and tDCS-condition. All models  
366 were corrected for multiple comparisons across space using 5000 permutations and  
367 thresholded using TFCE.

368

## 369 **Results**

### 370 *Cogmed performance*

371 Figure 3 shows Cogmed performance over time for each group and Table 2 displays  
372 corresponding summary statistics. Lme revealed a significant group-level improvement on all  
373 Cogmed tests included in the analysis. In addition, we found a significant association with age  
374 on mean performance across all tests, indicating lower average performance with higher age.  
375 We found no significant associations between Cogmed performance and sex, tDCS group  
376 (sham/experimental), or years of education. We found a significant interaction between time  
377 and tDCS on the twist task, suggesting augmented training gain in the participants in the  
378 active tDCS stimulation group. However, after removal of one outlier defined by visual  
379 inspection, the result did not reach significance (see Supplementary Table 1 and  
380 Supplementary Figure 4 for corresponding statistics and visualization).

381



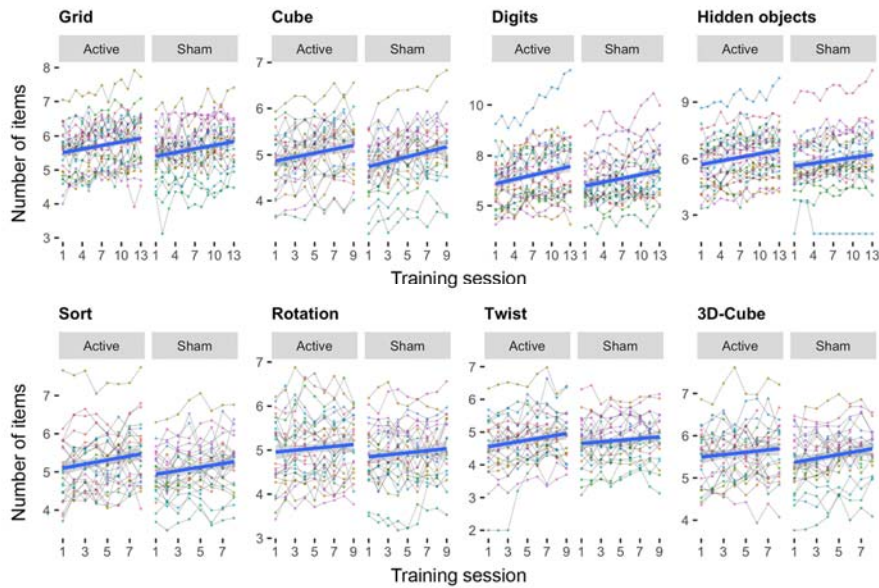

382  
383 **Figure 3.** Individual level task performance during the course of the intervention period for  
384 each group (tDCS sham/active). The fit lines are based on a linear fit within each group.  
385  
386

387

|                | Grid                                | Sort                                | Digits                               | Cube                                | Hidden objects                       | Twist                               | 3D-Cube                              | Rotation                         |
|----------------|-------------------------------------|-------------------------------------|--------------------------------------|-------------------------------------|--------------------------------------|-------------------------------------|--------------------------------------|----------------------------------|
| Session        | <b>8.66</b><br>( <i>&lt;0.001</i> ) | <b>6.40</b><br>( <i>&lt;0.001</i> ) | <b>12.79</b><br>( <i>&lt;0.001</i> ) | <b>7.44</b><br>( <i>&lt;0.001</i> ) | <b>11.03</b><br>( <i>&lt;0.001</i> ) | <b>6.45</b><br>( <i>&lt;0.001</i> ) | <b>3.16</b><br>( <i>0.002</i> )      | <b>2.21</b><br>( <i>0.028</i> )  |
| Age            | <b>-3.05</b><br>( <i>0.004</i> )    | <b>-2.11</b><br>( <i>0.041</i> )    | <b>-6.07</b><br>( <i>&lt;0.001</i> ) | <b>-2.54</b><br>( <i>0.015</i> )    | <b>-4.86</b><br>( <i>&lt;0.001</i> ) | <b>-3.62</b><br>( <i>0.001</i> )    | <b>-3.90</b><br>( <i>&lt;0.001</i> ) | <b>-3.41</b><br>( <i>0.001</i> ) |
| Sex            | -0.89<br>(0.377)                    | -0.33<br>(0.741)                    | -2.29<br>(0.027)                     | -1.22<br>(0.23)                     | -2.25<br>(0.029)                     | -1.46<br>(0.15)                     | -1.42<br>(0.162)                     | -1.34<br>(0.187)                 |
| tDCS           | -0.65<br>(0.521)                    | -1.03<br>(0.309)                    | -0.06<br>(0.951)                     | -0.53<br>(0.599)                    | 0.12<br>(0.908)                      | 1.00<br>(0.324)                     | -0.82<br>(0.414)                     | -0.81<br>(0.422)                 |
| Education      | 0.06<br>(0.951)                     | 0.96<br>(0.34)                      | 0.90<br>(0.374)                      | 0.14<br>(0.886)                     | 1.57<br>(0.124)                      | 0.01<br>(0.991)                     | -0.15<br>(0.884)                     | 0.33<br>(0.744)                  |
| Session x tDCS | 0.2<br>(0.842)                      | -0.39<br>(0.7)                      | -1.53<br>(0.128)                     | 0.46<br>(0.644)                     | -1.79<br>(0.074)                     | <b>-2.83</b><br>( <i>0.005</i> )    | 1.72<br>(0.087)                      | 1.23<br>(0.22)                   |

388 **Table 2.** Summary statistics ( t/(p) )from linear mixed effects models testing for associations  
389 between task performance and session, age, sex, tDCS, education and the interaction between  
390 session and tDCS. t-vaules along with raw p-vaules are displayed, significant findings are  
391 highlighted (FDR-corrected, alpha = 0.05).  
392  
393

394 We found no significant correlation between Cogmed average performance and Cogmed  
395 change score ( $r=.17$ ,  $t=1.29$ ,  $p=.2$ ). We found a significant association between lesion volume  
396 and Cogmed change score ( $t -2.5$ ,  $p=.017$ ), indicating a negative correlation between lesion  
397 volume and training response, which did not retain significance after removal of one outlier  
398 ( $t=-.58$ ,  $p=.563$ ). See Supplementary Table 2 for corresponding statistics. Furthermore,  
399 results revealed no significant correlations between time since injury and Cogmed average  
400 performance ( $r= -0.19$ ,  $t = -1.38$ ,  $p = 0.173$ ) nor Cogmed change score ( $-0.19$ ,  $t = -1.35$ ,  $p =$   
401  $0.181$ ).

402 Linear models revealed no significant associations between cognitive capacity as  
403 measured using Cabpad at baseline and gain in Cogmed performance. Furthermore, there  
404 were no significant interactions between Cabpad score at baseline and tDCS on Cogmed  
405 change score. See supplementary figure 6 and supplementary table 4 for corresponding  
406 statistics.

407

#### 408 *Behavioral fMRI results*

409 LME analysis revealed main effect of time on task performance during both load 1 and load  
410 2. Post hoc analysis revealed significant differences between timepoint 3 and 1, as well as  
411 between timepoint 2 and 1, but not between timepoint 3 and 2. See Table 3 and Figure 4 for  
412 details.

413

414

| Model  | Main effect |                 | Tp2 - Tp1   |                 | Tp3 - Tp1   |                 | Tp3 - Tp 2 |      |
|--------|-------------|-----------------|-------------|-----------------|-------------|-----------------|------------|------|
|        | F           | p               | t           | p               | t           | p               | t          | p    |
| Load 1 | <b>9.22</b> | <b>2.20e-04</b> | <b>3.52</b> | <b>1.28e-03</b> | <b>3.89</b> | <b>3.03e-04</b> | 0.36       | 1.00 |
| Load 2 | <b>8.24</b> | <b>5.04e-04</b> | 2.31        | 0.06            | <b>4.05</b> | <b>1.56e-04</b> | 1.73       | 0.25 |

415 **Table 3.** Summary statistics from linear mixed effects models testing for associations  
416 between task performance and session for the MOT task. Bonferroni-corrected p-values are  
417 displayed, significant results are highlighted.

418

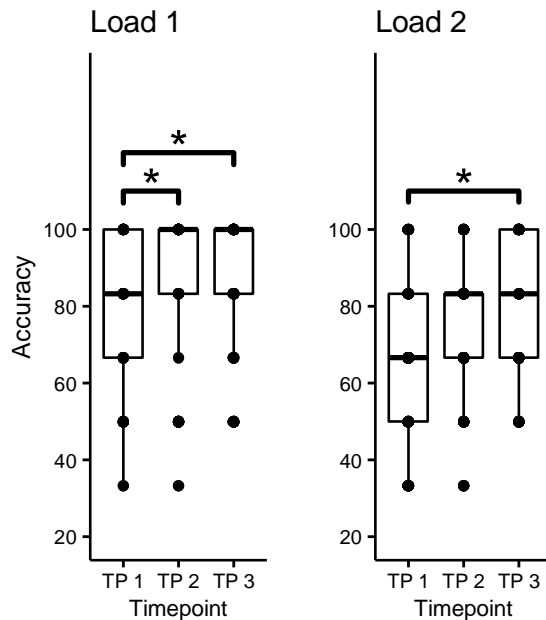

419  
420  
421  
422

**Figure 4.** Task performance during the MOT task at the three different timepoints. Significant differences in group means is marked \*, Table 3 displays corresponding statistics.

423 *Association between task performance and fMRI activation.*

424 Linear models revealed no significant association between in-scanner task performance and  
425 fMRI activation during neither load 1 or load 2 during the first assessment (TP 1). In-scanner  
426 behavioral performance was therefore not included in further analysis.

427

428 *fMRI main effects of task*

429 Figure 5 shows main effects of task condition at baseline, and Table 4 summarizes anatomical  
430 locations. Passive viewing was associated with increased activity in the dorsal attention  
431 network (DAN) and the inferior and superior occipital cortex, and decreased activation in pre  
432 and post-central gyrus, supplementary motor area (SMA), anterior cingulate, as well as  
433 default mode network (DMN), including posterior cingulate gyrus (PCC), medial prefrontal  
434 gyrus (mPFC), and superior and medial temporal gyrus (S/MTG).

435 Load 1 was associated with increased activity in DAN, extending into the inferior and  
436 superior occipital cortex, cerebellum, and precentral gyrus, in the cingulo-opercular (CO)  
437 network, including thalamus, frontal operculum and insula, as well as in the ventral attention

438 (VAN) network including temporoparietal junction and supramarginal gyrus, middle frontal  
439 gyrus, and frontal operculum. Decreased activity was seen in DMN nodes including PCC,  
440 mPFC and S/MTG. Load 2 showed a similar pattern to Load 1, with additional increased  
441 activation in right anterior middle frontal gyrus. Tracking over passive viewing revealed same  
442 activation pattern as load 1 and load 2, with additional bilateral activation of anterior middle  
443 frontal gyrus. Load-related (load 2 –load1) increases in activation were seen in superior and  
444 inferior parietal lobe, as well as right anterior middle frontal gyrus, with no significant load-  
445 dependent decreases in activation.  
446

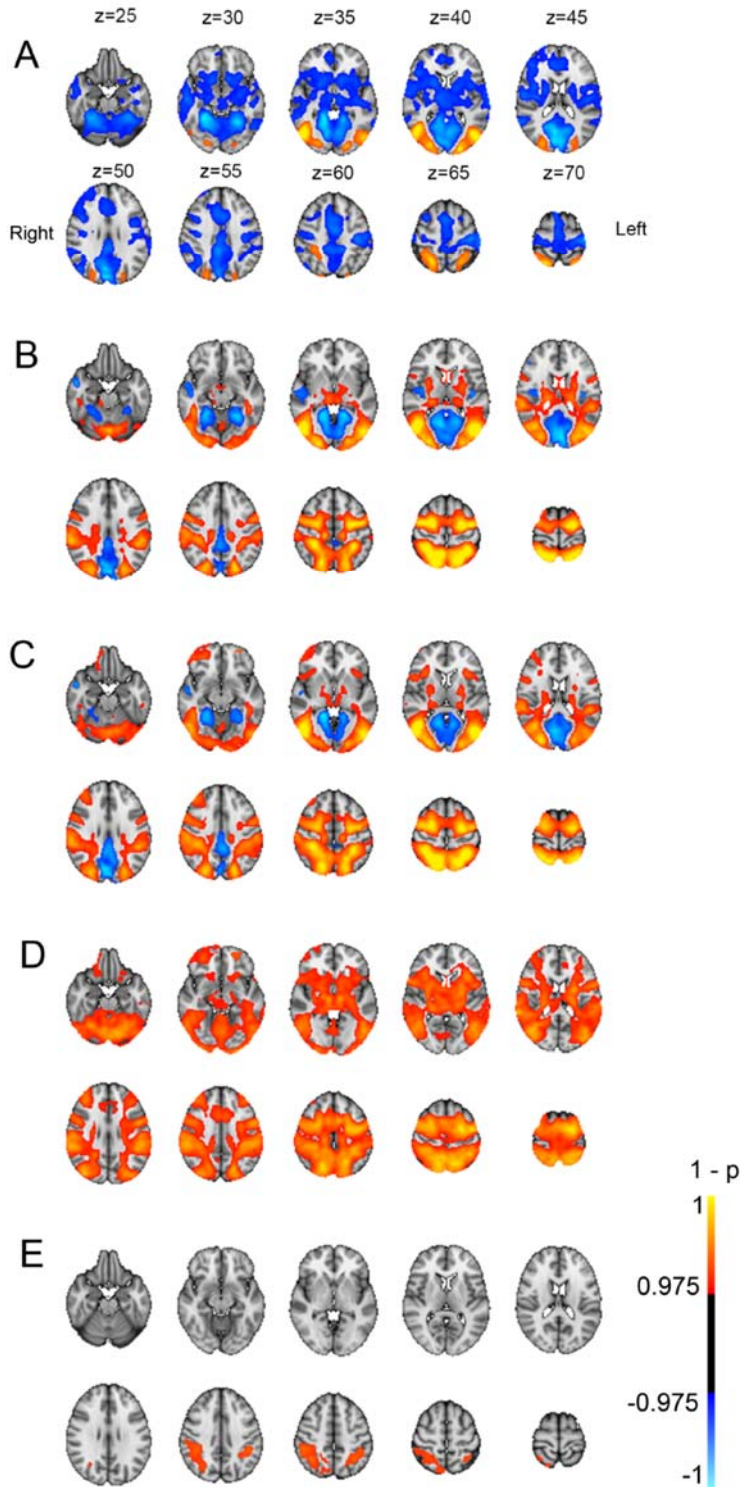

447  
448 **Figure 5.** Main effects from task-fMRI for (A) passive viewing > baseline, (B) load 1 >  
449 baseline, (C) load 2 > baseline, (D) tracking > passive viewing, and (E) increased cognitive  
450 load (load 2 > load 1). Panel A display corresponding coordinates in MNI, and left / right  
451 orientation. P-values (1-p) have been multiplied with the sign of the effect in relation to the  
452 main contrast.  
453

454

| Condition | Direction | size   | X  | Y  | Z  | Area                      |
|-----------|-----------|--------|----|----|----|---------------------------|
| PV        | pos       | 4029   | 33 | 19 | 30 | Lateral occipital cortex  |
|           | pos       | 3861   | 55 | 18 | 32 | Lateral occipital cortex  |
|           | pos       | 1784   | 29 | 41 | 61 | Superior parietal lobe    |
|           | neg       | 64337  | 33 | 35 | 21 | Cerebellum                |
| Load1     | pos       | 57023  | 59 | 29 | 8  | Cerebellum                |
|           | neg       | 12615  | 33 | 39 | 23 | Cerebellum                |
|           | neg       | 1494   | 19 | 62 | 24 | Middle temporal gyrus     |
|           | neg       | 256    | 65 | 53 | 42 | Central opercular cortex  |
|           | neg       | 153    | 20 | 78 | 48 | Middle frontal gyrus      |
|           | neg       | 19     | 22 | 71 | 50 | Inferior frontal gyrus    |
| Load2     | pos       | 66242  | 59 | 29 | 8  | Cerebellum                |
|           | pos       | 411    | 65 | 71 | 37 | Frontal operculum         |
|           | pos       | 8      | 65 | 80 | 55 | Middle frontal gyrus      |
|           | neg       | 10269  | 31 | 40 | 26 | Occipital fusiform cortex |
|           | neg       | 694    | 18 | 63 | 26 | Superior temporal gyrus   |
| Tracking  | pos       | 101656 | 59 | 29 | 8  | Cerebellum                |
| Load      | pos       | 4590   | 24 | 42 | 55 | Inferior parietal lobe    |
|           | pos       | 1709   | 67 | 42 | 56 | Inferior parietal lobe    |
|           | pos       | 245    | 24 | 79 | 54 | Middle frontal gyrus      |

455 **Table 4.** Clusters associated with different MOT condition at baseline (all  $p < .05$ , corrected)  
 456  
 457

458 *fMRI – reliability*

459 Figure 6 shows voxel-wise ICC for COPE values for passive viewing, load 1 and load 2,  
 460 between timepoint 2 and 3. The results revealed  $ICC > 0.4$  across major portions of the brain,  
 461 including occipital, temporal, parietal lobe for all conditions, as well as and a large part of the  
 462 frontal lobes for load 1.

463

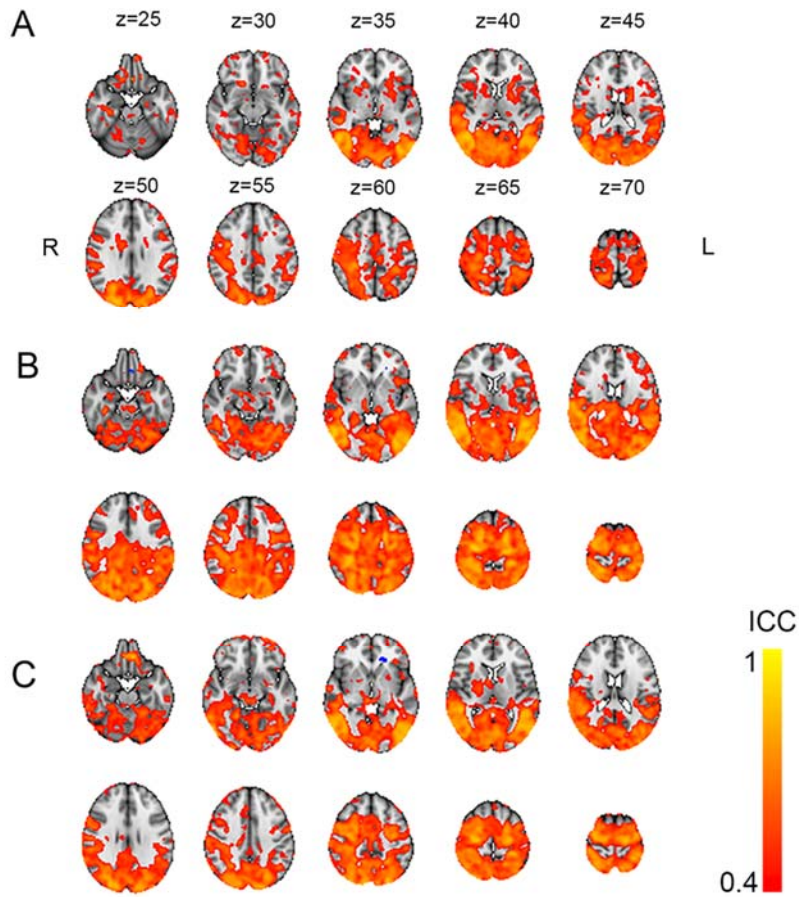

464  
465 **Figure 6.** Voxel-wise ICC for condition passive viewing (A), load 1 (B), and load 2 (C).  
466 Thresholded at ICC > 0.4.  
467

468 *Pairwise comparison of fMRI estimates across timepoints*

469 Comparison of fMRI signal between the timepoints revealed no significant differences  
470 between timepoint 3 and 1, timepoint 2 and 1 as well timepoint 3 and 2, for neither passive  
471 viewing, load 1, load 2, tracking nor load, indicating fluctuating patterns, but not in a time-  
472 dependent manner.

473

474

475

476

477 *Cogmed –fMRI associations*

478 We found no significant associations between the Cogmed change score and brain activation  
 479 at timepoint 1, or between Cogmed change score and the difference in brain activation  
 480 between timepoint 2 and 3.

481 Furthermore, results revealed no significant associations between the Cogmed average  
 482 score and brain activation at timepoint 1. However, between timepoint 2 and 3 we found a  
 483 significant association between Cogmed average performance score and the difference in  
 484 activation during attentive tracking, indicating larger activation increases in the anterior and  
 485 posterior parts of the cingulate cortex and left precuneus, superior parietal lobe, lateral  
 486 occipital cortex, as well as cerebellum with greater average Cogmed performance. See Table  
 487 5 and Figure 7 for corresponding statistics. Using a Cogmed average performance score based  
 488 on all 8 subtests (from the PCA, now including two sub-tests previously excluded), revealed  
 489 slightly weaker but highly similar effects in the (Supplementary Figure 5 and Table 3),  
 490 suggesting that excluding the two subtests did not bias the results.

491  
 492

|            | Direction | Size | x    | y    | z    | Location                 |
|------------|-----------|------|------|------|------|--------------------------|
| Frontal    | pos       | 120  | 30.1 | 64.4 | 61.4 | Middle frontal gyrus     |
|            | pos       | 46   | 59.5 | 63.9 | 60.5 | MFG L                    |
| Limbic     | pos       | 1269 | 41.7 | 74.2 | 53.3 | ACC                      |
|            | pos       | 261  | 43.8 | 52.3 | 53.8 | PCC                      |
| Parietal   | pos       | 83   | 23   | 36.8 | 61.9 | SPL                      |
|            | pos       | 207  | 55   | 30.2 | 48.7 | Precuneus cortex         |
| Occipital  | pos       | 117  | 21.5 | 25.9 | 39.3 | Lateral occipital cortex |
|            | pos       | 100  | 61.6 | 22.7 | 44.4 | Lateral occipital cortex |
|            | pos       | 33   | 35.8 | 15.3 | 36.3 | Occipital pole           |
| Cerebellar | pos       | 54   | 60   | 26   | 13   | Cerebellum               |
|            | pos       | 16   | 41.1 | 37.2 | 23.5 | Cerebellum               |

493 **Table 5.** Cogmed average score clusters associated with difference in activation between  
 494 timepoint 2 and 3. (all  $p < .05$ , corrected).  
 495



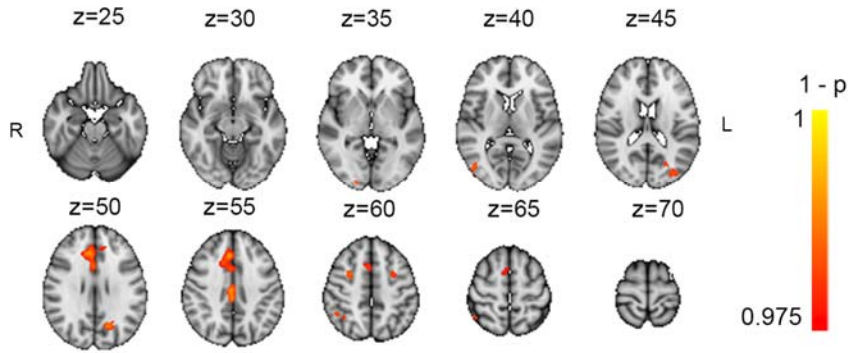

496  
497 **Figure 7.** Association between Cogmed average performance score, and difference in task-  
498 related activation (L1 & L2 > PV) between timepoint 3 and 2.  
499

500 *tDCS –fMRI associations*

501 Results revealed no difference in fMRI-activation between the active and sham tDCS  
502 stimulation groups.

503

504 **Discussion**

505 In this study, we tested the predictive value of fMRI-based brain activation on performance  
506 gains following a commercially available working memory training package. Additionally,  
507 we investigated whether active tDCS combined with Cogmed induced neural alterations  
508 measured with task-based fMRI.

509 The results revealed significant increase in performance on the trained tasks, with no  
510 additional benefits from tDCS on training gain. Our analysis revealed robust activation in  
511 response to the MOT task in line with previous findings. It is important to note that the  
512 current study investigated possible markers for individual training outcome, and a  
513 comprehensive evaluation of the potential behavioral and clinical transfer effects is beyond  
514 the scope of the current study. Importantly, investigation of reliability across timepoints  
515 supported the feasibility of utilizing task-fMRI for delineating neural correlates of behavioral  
516 training in a clinical group. Following the promising reliability in brain activation across the  
517 different fMRI assessments, we found no significant association between cognitive

518 performance gain during the cognitive training and brain activation prior to training, or with  
519 brain activation change between pre- and post-training. However, higher average performance  
520 across the training period was associated with higher load-dependent increase in activation in  
521 the precuneus, and furthermore associated with increased activation in the DAN and DMN as  
522 well as the ACC during active task performance after compared to before intervention.

523 Tailoring behavioral interventions for alleviating cognitive difficulties following  
524 stroke calls for investigation of both treatment response, as well as delineating factors  
525 predicting favorable outcome. Cognitive abilities prior to training as well as motivation (Guye  
526 et al., 2017; Jaeggi et al., 2014) are currently among our best predictors for beneficial effects.  
527 Our results revealed significant improvement on all included tasks from the training program,  
528 in line with previous reports (Spencer-Smith and Klingberg, 2015; Westerberg et al., 2007).  
529 Our results support that repeated practice, where level of difficulty is adjusted during training,  
530 improves performance on the trained tasks. It is important to note that the current study  
531 investigates possible biomarkers for individual training outcome, and its beyond our aim to  
532 evaluate potential behavioral transfer effects. However, the generalizability of training-effects  
533 following CCT has been debated (Au et al., 2015; Melby-Lervåg and Hulme, 2013; Morrison  
534 and Chein, 2011; Shipstead et al., 2012; von Bastian and Oberauer, 2014). Indeed, recent  
535 large-scale reviews suggest a lack of reliable transfer beyond tasks that share properties with  
536 the trained tasks (Melby-Lervåg et al., 2016; Sala and Gobet, 2018). The lack of transfer  
537 effects is suggested to be caused by the failure of targeting common mechanisms underlying  
538 fluid intelligence such as working memory and attention, and rather targeting task specific  
539 mechanisms through repeated practice (Melby-Lervåg et al., 2016). Despite our promising  
540 behavioral results on trained tasks, the lack of transfer-effects reported in the literature calls  
541 for caution before implementation in a clinical setting.

542 Our results revealed no significant interaction between cognitive improvement and  
543 tDCS stimulation with the exception of one of the trained tasks, which did not reach

544 significance after removal of an outlier. Although anodal tDCS has shown beneficial effects  
545 on cognitive training compared with sham stimulation in healthy adults (Martin et al., 2013)  
546 and have been associated with steeper learning curves (Ruf et al., 2017), a recent meta-  
547 analysis provided no support of a beneficial effect of tDCS on cognitive training compared to  
548 sham (Medina and Cason, 2017). The current literature investigating the added effect of tDCS  
549 when combined with working memory training in stroke patients is scarce. Single session  
550 anodal tDCS towards the left DLPFC improved recognition accuracy during an N-back task  
551 (Jo et al., 2009), and longitudinal concurrent anodal tDCS and CCT increased accuracy on a  
552 non-trained continuous performance test (CPT) compared to sham (Park et al., 2013).  
553 However, divergence in study protocols and results hampers a direct comparison (daSilva  
554 Filho et al., 2017). Beyond robust improvement on all trained tasks during the course of the  
555 intervention, our results provide no evidence of additional beneficial effects of tDCS  
556 stimulation. Intriguingly, current investigations aim to evaluate how home-based tDCS may  
557 aid patients with mild cognitive impairments (Park et al., 2019). This will potentially provide  
558 novel insights regarding clinical application for tDCS.

559         Our fMRI results for task activation during the first assessment revealed increased  
560 activation of the DAN, along with deactivation of DMN for passive viewing, load 1 and load  
561 2. Further, contrasting tracking to passive viewing, and load 2 to load 1 revealed that attentive  
562 tracking increased DAN activation in a load-dependent manner, in line with previous reports  
563 based on healthy samples (Alnæs et al., 2014; Dørum et al., 2016).

564         Importantly, longitudinal studies utilizing fMRI for investigation of within-subject  
565 changes depends on the reliability of brain measurements across time in order to pick up the  
566 relevant signal. Previous investigations suggest favorable reliability in task based compared to  
567 resting-state fMRI (Specht, 2020), indicating higher reliability when the task elicits strong  
568 patterns of activation (Johnstone et al., 2005) increasing contrast to noise ratio (Bennett and  
569 Miller, 2010). Our results are in line with these reports, as results revealed fair (>0.4) to good

570 (>0.75) reliability across task-associated brain regions following guidelines for ICC  
571 interpretation (Cicchetti, 1994), with poor reliability in non-task associated areas.

572 Our results revealed no significant interaction between activation during passive  
573 viewing, load 1, load 2, tracking nor load, and time. Although we did not find any predictive  
574 value of fMRI-activation patterns on Cogmed performance improvement, our results revealed  
575 an association between average performance during the Cogmed training period and increased  
576 tracking-related activity in key nodes of the DAN and DMN as well as ACC. DMN is  
577 commonly suppressed during task engagement, with increasing suppression with increased  
578 task demands (Anticevic et al., 2012). Furthermore, cognitive abilities are negatively  
579 correlated with degree of de-activation (Lipp et al., 2012), most likely due to need for higher  
580 effort to resolve the task. In line with these findings our results indicate less suppression of  
581 PCC and precuneus during task engagement, with greater average performance.

582 Working memory capacity, reflecting both executive control as well as cognitive  
583 flexibility, has been linked to general cognitive abilities (Conway et al., 2003). Furthermore,  
584 higher cognitive abilities have been associated with increased activity in frontal and parietal  
585 cortices (Basten et al., 2015), and cognitive flexibility have been linked to brain activation in  
586 ventrolateral prefrontal cortex, as well as anterior and posterior cingulate (Dajani and Uddin,  
587 2015). As our results indicate that greater cognitive capacity is associated with an increase in  
588 activation during task engagement over time, it may reflect compensation and learning to  
589 more efficiently resolve the task.

590 The current findings should be interpreted in light of several limitations. Based on the  
591 clinical ratings (NIHSS) at hospital discharge, the patients were sampled from the less severe  
592 part of the stroke severity spectrum. Further, patient drop-out during the intervention was  
593 relatively high, partly due to the labor-intensity of the training. Hence, our sample is biased  
594 towards higher functioning stroke patients, rendering the generalizability of our results to  
595 more severe cases unclear. The lack of a control group for the CCT does not allow us to

596 disentangle effects of the cognitive training from the effect of time, anticipation, or other  
597 confounders. As our main aim was to identify potential fMRI-based markers for training  
598 outcome, we did not assess possible cognitive and clinical transfer effects, which will be  
599 relevant for evaluating clinical relevance, and further studies are needed to establish the  
600 premises for optimizing the clinical potential for working memory interventions in individual  
601 stroke patients. It has furthermore been reported that potential beneficial effects of tDCS may  
602 emerge at a delayed stage after intervention (Goodwill et al., 2016; Li et al., 2019). As our last  
603 assessment was performed shortly after the final stimulation, any delayed effects may have  
604 been lost. Future follow-up assessments of the same patients may provide relevant  
605 information about potential long-term effects of CCT and tDCS. Potential effects also may be  
606 dependent of stimulation frequency (Boggio et al., 2007; Yun et al., 2015). Increasing  
607 frequency beyond current protocol may have altered our results. Lesion size and location  
608 may influence current flow and cortical excitability (Marquez et al., 2013), and future studies  
609 may test for associations between lesion characteristics and response to tDCS. While the  
610 degree of cognitive impairment at baseline is likely to influence the response to cognitive  
611 training and rehabilitation in general, we found no significant association between baseline  
612 cognitive performance and training gain. However, the lack of pre-stroke neuropsychological  
613 evaluation complicates the assessment of stroke-related cognitive impairment. The group  
614 level task activation patterns in the current study largely mirrored those reported in previous  
615 studies in healthy controls (Alnæs et al., 2015a; Dørum et al., 2016). However, the current  
616 study design did not allow us to make an explicit comparison (D'Esposito et al., 2003). Here  
617 we only considered brain activation in response to task demands. Future studies should also  
618 pursue a promising line of research utilizing imaging indices of structural and functional  
619 connectivity to investigate behavioral correlates of stroke, which may supplement and  
620 increase our understanding of stroke and stroke recovery.

621 In conclusion, we have investigated response to a computerized cognitive training  
622 program in 54 stroke survivors in combination with tDCS, as well as the predictive value of  
623 neural activation on training outcome, and neural alterations following training. Our results  
624 revealed increased performance across all trained tasks, with no additional benefit of tDCS.  
625 Brain activation prior to the training was not predictive for training outcome, nor was training  
626 gains reflected in altered brain activation. The generalizability of the reported beneficial  
627 effects of CCT remains uncertain, and future studies may be able to assess the transfer value  
628 of for relevant cognitive and clinical variables in stroke patients.

629

## 630 **References**

- 631 Adams, H.P., Bendixen, B.H., Kappelle, L.J., Biller, J., Love, B.B., Gordon, D.L., Marsh,  
632 E.E., 1993. Classification of subtype of acute ischemic stroke. Definitions for use in a  
633 multicenter clinical trial. TOAST. Trial of Org 10172 in Acute Stroke Treatment. *Stroke* 24,  
634 35-41.
- 635 Alnæs, D., Kaufmann, T., Richard, G., Duff, E.P., Sneve, M.H., Endestad, T., Nordvik, J.E.,  
636 Andreassen, O.A., Smith, S.M., Westlye, L.T., 2015a. Attentional load modulates large-scale  
637 functional brain connectivity beyond the core attention networks. *NeuroImage* 109, 260-272.
- 638 Alnæs, D., Sneve, M.H., Espeseth, T., Endestad, T., van de Pavert, S.H.P., Laeng, B., 2014.  
639 Pupil size signals mental effort deployed during multiple object tracking and predicts brain  
640 activity in the dorsal attention network and the locus coeruleus. *Journal of Vision* 14, 1-1.
- 641 Alnæs, D., Sneve, M.H., Richard, G., Skåtun, K.C., Kaufmann, T., Nordvik, J.E., Andreassen,  
642 O.A., Endestad, T., Laeng, B., Westlye, L.T., 2015b. Functional connectivity indicates  
643 differential roles for the intraparietal sulcus and the superior parietal lobule in multiple object  
644 tracking. *NeuroImage* 123, 129-137.
- 645 Altamura, C., Reinhard, M., Vry, M.-S., Kaller, C.P., Hamzei, F., Vernieri, F., Rossini, P.M.,  
646 Hetzel, A., Weiller, C., Saur, D., 2009. The longitudinal changes of BOLD response and  
647 cerebral hemodynamics from acute to subacute stroke. A fMRI and TCD study. *BMC*  
648 *Neuroscience* 10, 151.
- 649 Andrews, S.C., Hoy, K.E., Enticott, P.G., Daskalakis, Z.J., Fitzgerald, P.B., 2011. Improving  
650 working memory: the effect of combining cognitive activity and anodal transcranial direct  
651 current stimulation to the left dorsolateral prefrontal cortex. *Brain Stimulation* 4, 84-89.
- 652 Anticevic, A., Cole, M.W., Murray, J.D., Corlett, P.R., Wang, X.-J., Krystal, J.H., 2012. The  
653 role of default network deactivation in cognition and disease. *Trends in Cognitive Sciences*  
654 16, 584-592.
- 655 Au, J., Sheehan, E., Tsai, N., Duncan, G.J., Buschkuhl, M., Jaeggi, S.M., 2015. Improving  
656 fluid intelligence with training on working memory: a meta-analysis. *Psychonomic Bulletin &*  
657 *Review* 22, 366-377.
- 658 Barbay, M., Diouf, M., Roussel, M., Godefroy, O., 2018. Systematic Review and Meta-  
659 Analysis of Prevalence in Post-Stroke Neurocognitive Disorders in Hospital-Based Studies.  
660 *Dementia and Geriatric Cognitive Disorders* 46, 322-334.

- 661 Basten, U., Hilger, K., Fiebach, C.J., 2015. Where smart brains are different: A quantitative  
662 meta-analysis of functional and structural brain imaging studies on intelligence. *Intelligence*  
663 51, 10-27.
- 664 Bennett, C.M., Miller, M.B., 2010. How reliable are the results from functional magnetic  
665 resonance imaging? *Annals of the New York Academy of Sciences* 1191, 133-155.
- 666 Buitenweg, J.I.V., Van De Ven, R.M., Ridderinkhof, K.R., Murre, J.M.J., 2018. Does  
667 cognitive flexibility training enhance subjective mental functioning in healthy older adults?  
668 *Aging, Neuropsychology, and Cognition*, 1-23.
- 669 Cicchetti, D.V., 1994. Guidelines, criteria, and rules of thumb for evaluating normed and  
670 standardized assessment instruments in psychology. American Psychological Association,  
671 US, pp. 284-290.
- 672 Clare Kelly, A.M., Hester, R., Foxe, J.J., Shpaner, M., Garavan, H., 2006. Flexible cognitive  
673 control: Effects of individual differences and brief practice on a complex cognitive task.  
674 *NeuroImage* 31, 866-886.
- 675 Clas, P., Groeschel S Fau - Wilke, M., Wilke, M., 2012. A semi-automatic algorithm for  
676 determining the demyelination load in metachromatic leukodystrophy. *Academic Radiology*  
677 19.
- 678 Constantinidis, C., Klingberg, T., 2016. The neuroscience of working memory capacity and  
679 training. *Nature Reviews Neuroscience* 17, 438.
- 680 Conway, A.R.A., Kane, M.J., Engle, R.W., 2003. Working memory capacity and its relation  
681 to general intelligence. *Trends in Cognitive Sciences* 7, 547-552.
- 682 D'Esposito, M., Deouell, L.Y., Gazzaley, A., 2003. Alterations in the BOLD fMRI signal with  
683 ageing and disease: a challenge for neuroimaging. *Nature Reviews Neuroscience* 4, 863.
- 684 Dajani, D.R., Uddin, L.Q., 2015. Demystifying cognitive flexibility: Implications for clinical  
685 and developmental neuroscience. *Trends in Neurosciences* 38, 571-578.
- 686 daSilva Filho, E.M., Andrade deAlbuquerque, J., Mescouto, K.A., deAbreu Freitas, R.P.,  
687 2017. Effects of transcranial direct current stimulation on the working memory of post-stroke  
688 people: an integrative review. *Manual Therapy, Posturology & Rehabilitation Journal=*  
689 *Revista Manual Therapy* 15.
- 690 de Haan, B., Clas, P., Juenger, H., Wilke, M., Karnath, H.-O., 2015. Fast semi-automated  
691 lesion demarcation in stroke. *NeuroImage. Clinical* 9, 69-74.
- 692 De Luca, R., Calabrò, R.S., Bramanti, P., 2018a. Cognitive rehabilitation after severe  
693 acquired brain injury: current evidence and future directions. *Neuropsychological*  
694 *Rehabilitation* 28, 879-898.
- 695 De Luca, R., Leonardi, S., Spadaro, L., Russo, M., Aragona, B., Torrisi, M., Maggio, M.G.,  
696 Bramanti, A., Naro, A., De Cola, M.C., Calabrò, R.S., 2018b. Improving Cognitive Function  
697 in Patients with Stroke: Can Computerized Training Be the Future? *Journal of Stroke and*  
698 *Cerebrovascular Diseases* 27, 1055-1060.
- 699 Dedoncker, J., Brunoni, A.R., Baeken, C., Vanderhasselt, M.-A., 2016. A Systematic Review  
700 and Meta-Analysis of the Effects of Transcranial Direct Current Stimulation (tDCS) Over the  
701 Dorsolateral Prefrontal Cortex in Healthy and Neuropsychiatric Samples: Influence of  
702 Stimulation Parameters. *Brain Stimulation* 9, 501-517.
- 703 Dørum, E.S., Alnæs, D., Kaufmann, T., Richard, G., Lund, M.J., Tønnesen, S., Sneve, M.H.,  
704 Mathiesen, N.C., Rustan, Ø.G., Gjertsen, Ø., Vatn, S., Fure, B., Andreassen, O.A., Nordvik,  
705 J.E., Westlye, L.T., 2016. Age-related differences in brain network activation and co-  
706 activation during multiple object tracking. *Brain and Behavior* 6, e00533.
- 707 Erickson, K.I., Colcombe, S.J., Wadhwa, R., Bherer, L., Peterson, M.S., Scalf, P.E., Kim,  
708 J.S., Alvarado, M., Kramer, A.F., 2006. Training-Induced Functional Activation Changes in  
709 Dual-Task Processing: An fMRI Study. *Cerebral cortex* 17, 192-204.
- 710 Feigin, V.L., Norrving, B., Mensah, G.A., 2017. Global Burden of Stroke. *Circulation*  
711 *Research* 120, 439.

712 Fregni, F., Boggio Ps Fau - Nitsche, M., Nitsche M Fau - Bermanpohl, F., Bermanpohl F Fau -  
713 Antal, A., Antal A Fau - Feredoes, E., Feredoes E Fau - Marcolin, M.A., Marcolin Ma Fau -  
714 Rigonatti, S.P., Rigonatti Sp Fau - Silva, M.T.A., Silva Mt Fau - Paulus, W., Paulus W Fau -  
715 Pascual-Leone, A., Pascual-Leone, A., 2005. Anodal transcranial direct current stimulation of  
716 prefrontal cortex enhances working memory. *Experimental Brain Research*.  
717 Giordano, J., Bikson, M., Kappenman, E.S., Clark, V.P., Coslett, H.B., Hamblin, M.R.,  
718 Hamilton, R., Jankord, R., Kozumbo, W.J., McKinley, R.A., Nitsche, M.A., Reilly, J.P.,  
719 Richardson, J., Wurzman, R., Calabrese, E., 2017. Mechanisms and Effects of Transcranial  
720 Direct Current Stimulation. *Dose-Response* 15, 1559325816685467.  
721 Goldstein, L.B., Bertels, C., Davis, J.N., 1989. Interrater Reliability of the NIH Stroke Scale.  
722 *Archives of Neurology* 46, 660-662.  
723 Graham, S., Jiang J Fau - Manning, V., Manning V Fau - Nejad, A.B., Nejad Ab Fau -  
724 Zhisheng, K., Zhisheng K Fau - Salleh, S.R., Salleh Sr Fau - Golay, X., Golay X Fau - Berne,  
725 Y.I., Berne Yi Fau - McKenna, P.J., McKenna, P.J., 2010. IQ-related fMRI differences during  
726 cognitive set shifting. *Cerebral cortex* 20.  
727 Guye, S., De Simoni, C., von Bastian, C.C., 2017. Do Individual Differences Predict Change  
728 in Cognitive Training Performance? A Latent Growth Curve Modeling Approach. *Journal of*  
729 *Cognitive Enhancement* 1, 374-393.  
730 Haut, K.M., Lim, K.O., MacDonald Iii, A., 2010. Prefrontal Cortical Changes Following  
731 Cognitive Training in Patients with Chronic Schizophrenia: Effects of Practice,  
732 Generalization, and Specificity. *Neuropsychopharmacology* 35, 1850.  
733 Heinzl, S., Lorenz, R.C., Pelz, P., Heinz, A., Walter, H., Kathmann, N., Rapp, M.A., Stelzel,  
734 C., 2016. Neural correlates of training and transfer effects in working memory in older adults.  
735 *NeuroImage* 134, 236-249.  
736 Hill, A.T., Fitzgerald, P.B., Hoy, K.E., 2016. Effects of Anodal Transcranial Direct Current  
737 Stimulation on Working Memory: A Systematic Review and Meta-Analysis of Findings From  
738 Healthy and Neuropsychiatric Populations. *Brain Stimulation* 9, 197-208.  
739 Hothorn, T., Bretz, F., Westfall, P., 2008. Simultaneous Inference in General Parametric  
740 Models. *Biometrical Journal* 50, 346-363.  
741 Jaeggi, S.M., Buschkuhl, M., Shah, P., Jonides, J., 2014. The role of individual differences  
742 in cognitive training and transfer. *Memory & Cognition* 42, 464-480.  
743 Jenkinson, M., Bannister, P., Brady, M., Smith, S., 2002. Improved Optimization for the  
744 Robust and Accurate Linear Registration and Motion Correction of Brain Images.  
745 *NeuroImage* 17, 825-841.  
746 Jenkinson, M., Beckmann, C.F., Behrens, T.E.J., Woolrich, M.W., Smith, S.M., 2012. FSL.  
747 *NeuroImage* 62, 782-790.  
748 Jenkinson, M., Smith, S., 2001. A global optimisation method for robust affine registration of  
749 brain images. *Medical Image Analysis* 5, 143-156.  
750 Jo, J.M., Kim, Y.-H., Ko, M.-H., Ohn, S.H., Joen, B., Lee, K.H., 2009. Enhancing the  
751 Working Memory of Stroke Patients Using tDCS. *American Journal of Physical Medicine &*  
752 *Rehabilitation* 88.  
753 Johnstone, T., Somerville, L.H., Alexander, A.L., Oakes, T.R., Davidson, R.J., Kalin, N.H.,  
754 Whalen, P.J., 2005. Stability of amygdala BOLD response to fearful faces over multiple scan  
755 sessions. *NeuroImage* 25, 1112-1123.  
756 Kang, N., Summers, J.J., Cauraugh, J.H., 2015. Transcranial direct current stimulation  
757 facilitates motor learning post-stroke: a systematic review and meta-analysis. *Journal of*  
758 *Neurology, Neurosurgery & Psychiatry*.  
759 Lawrence, B.J., Gasson, N., Johnson, A.R., Booth, L., Loftus, A.M., 2018. Cognitive Training  
760 and Transcranial Direct Current Stimulation for Mild Cognitive Impairment in Parkinson's  
761 Disease: A Randomized Controlled Trial. *Parkinson's Disease* 2018.



- 762 Leung, I.H.K., Walton, C.C., Hallock, H., Lewis, S.J.G., Valenzuela, M., Lampit, A., 2015.  
763 Cognitive training in Parkinson disease: A systematic review and meta-analysis. *Neurology*  
764 85, 1843-1851.
- 765 Lin, Z.C., Tao, J., Gao, Y.L., Yin, D.Z., Chen, A.Z., Chen, L.D., 2014. Analysis of central  
766 mechanism of cognitive training on cognitive impairment after stroke: Resting-state  
767 functional magnetic resonance imaging study. *Journal of International Medical Research* 42.  
768 Lipp, I., Benedek, M., Fink, A., Koschutnig, K., Reishofer, G., Bergner, S., Ischebeck, A.,  
769 Ebner, F., Neubauer, A., 2012. Investigating neural efficiency in the visuo-spatial domain: an  
770 fMRI study. *PloS one* 7, e51316-e51316.
- 771 Maffei, L., Picano, E., Andreassi, M.G., Angelucci, A., Baldacci, F., Baroncelli, L.,  
772 Begenisic, T., Bellinvia, P.F., Berardi, N., Biagi, L., Bonaccorsi, J., Bonanni, E., Bonuccelli,  
773 U., Borghini, A., Braschi, C., Broccardi, M., Bruno, R.M., Caleo, M., Carlesi, C., Carnicelli,  
774 L., Cartoni, G., Cecchetti, L., Cenni, M.C., Ceravolo, R., Chico, L., Cintoli, S., Cioni, G.,  
775 Coscia, M., Costa, M., D'Angelo, G., D'Ascanio, P., Nes, M.D., Turco, S.D., Coscio, E.D.,  
776 Galante, M.D., Lascio, N.d., Faita, F., Falorni, I., Faraguna, U., Fenu, A., Fortunato, L.,  
777 Franco, R., Gargani, L., Gargiulo, R., Ghiadoni, L., Giorgi, F.S., Iannarella, R., Iofrida, C.,  
778 Kusmic, C., Limongi, F., Maestri, M., Maffei, M., Maggi, S., Mainardi, M., Mammana, L.,  
779 Marabotti, A., Mariotti, V., Melissari, E., Mercuri, A., Micera, S., Molinaro, S., Narducci, R.,  
780 Navarra, T., Noale, M., Pagni, C., Palumbo, S., Pasquariello, R., Pellegrini, S., Pietrini, P.,  
781 Pizzorusso, T., Poli, A., Pratali, L., Retico, A., Ricciardi, E., Rota, G., Sale, A., Sbrana, S.,  
782 Scabia, G., Scali, M., Scelfo, D., Sicari, R., Siciliano, G., Stea, F., Taddei, S., Tognoni, G.,  
783 Tonacci, A., Tosetti, M., Turchi, S., Volpi, L., 2017. Randomized trial on the effects of a  
784 combined physical/cognitive training in aged MCI subjects: the Train the Brain study.  
785 *Scientific Reports* 7, 39471.
- 786 Mahon, S., Parmar, P., Barker-Collo, S., Krishnamurthi, R., Jones, K., Theadom, A., Feigin,  
787 V., 2017. Determinants, Prevalence, and Trajectory of Long-Term Post-Stroke Cognitive  
788 Impairment: Results from a 4-Year Follow-Up of the ARCOS-IV Study. *Neuroepidemiology*  
789 49, 129-134.
- 790 Marquez, J., van Vliet, P., McElduff, P., Lagopoulos, J., Parsons, M., 2015. Transcranial  
791 Direct Current Stimulation (tDCS): Does it Have Merit in Stroke Rehabilitation? A  
792 Systematic Review. *International Journal of Stroke* 10, 306-316.
- 793 Martin, D.M., Liu, R., Alonzo, A., Green, M., Player, M.J., Sachdev, P., Loo, C.K., 2013.  
794 Can transcranial direct current stimulation enhance outcomes from cognitive training? A  
795 randomized controlled trial in healthy participants. *International Journal of*  
796 *Neuropsychopharmacology* 16, 1927-1936.
- 797 Medina, J., Cason, S., 2017. No evidential value in samples of transcranial direct current  
798 stimulation (tDCS) studies of cognition and working memory in healthy populations. *Cortex*  
799 94, 131-141.
- 800 Melby-Lervåg, M., Hulme, C., 2013. Is working memory training effective? A meta-analytic  
801 review. *Developmental Psychology* 49, 270-291.
- 802 Melby-Lervåg, M., Redick, T.S., Hulme, C., 2016. Working Memory Training Does Not  
803 Improve Performance on Measures of Intelligence or Other Measures of "Far Transfer":  
804 Evidence From a Meta-Analytic Review. *Perspectives on Psychological Science* 11, 512-534.
- 805 Miró-Padilla, A., Bueichekú, E., Ventura-Campos, N., Flores-Compañ, M.-J., Parcet, M.A.,  
806 Ávila, C., 2018. Long-term brain effects of N-back training: an fMRI study. *Brain Imaging*  
807 *and Behavior*.
- 808 Morrison, A.B., Chein, J.M., 2011. Does working memory training work? The promise and  
809 challenges of enhancing cognition by training working memory. *Psychonomic Bulletin &*  
810 *Review* 18, 46-60.
- 811 Motes, M.A., Yezhuvath, U.S., Aslan, S., Spence, J.S., Rypma, B., Chapman, S.B., 2018.  
812 Higher-order cognitive training effects on processing speed-related neural activity: a  
813 randomized trial. *Neurobiology of Aging* 62, 72-81.

- 814 Motter, J.N., Pimontel, M.A., Rindskopf, D., Devanand, D.P., Doraiswamy, P.M., Sneed,  
815 J.R., 2016. Computerized cognitive training and functional recovery in major depressive  
816 disorder: A meta-analysis. *Journal of Affective Disorders* 189, 184-191.
- 817 Ørbeck, B., Sundet, K., 2007. WASI (Wechsler Abbreviated Scale of Intelligence) Norsk  
818 versjon Manuals supplement. Stockholm: Harcourt Assessment Inc.
- 819 P. Filzmoser, Gschwandtner, M., 2018. mvoutlier: Multivariate Outlier Detection Based on  
820 Robust Methods.
- 821 Park, S.H., Koh, E.J., Choi, H.Y., Ko, M.H., 2013. A double-blind, sham-controlled, pilot  
822 study to assess the effects of the concomitant use of transcranial direct current stimulation  
823 with the computer assisted cognitive rehabilitation to the prefrontal cortex on cognitive  
824 functions in patients with stroke. *J Korean Neurosurg Soc.* 54.
- 825 Peers, P.V., Astle, D.E., Duncan, J., Murphy, F., Hampshire, A., Das, T., Manly, T., 2018. A  
826 randomised exploratory investigation of the effects of Attention vs Working Memory  
827 Training on cognitive performance and everyday functioning following stroke. *bioRxiv.*
- 828 Pendlebury, S.T., 2012. Dementia in Patients Hospitalized with Stroke: Rates, Time Course,  
829 and Clinico-Pathologic Factors. *International Journal of Stroke* 7, 570-581.
- 830 Pinheiro, J., Bates, D., DebRoy, S., Sarkar, D., Team, R.C., 2017. nlme: Linear and  
831 Nonlinear Mixed Effects Models - R package version 3.1-131.
- 832 Prikken, M., Konings, M.J., Lei, W.U., Begemann, M.J.H., Sommer, I.E.C., 2018. The  
833 efficacy of computerized cognitive drill and practice training for patients with a  
834 schizophrenia-spectrum disorder: A meta-analysis. *Schizophrenia Research.*
- 835 Pylyshyn, Z.W., Storm, R.W., 1988. Tracking multiple independent targets: evidence for a  
836 parallel tracking mechanism.
- 837 Ramsay, I.S., MacDonald, I.I.A.W., 2015. Brain Correlates of Cognitive Remediation in  
838 Schizophrenia: Activation Likelihood Analysis Shows Preliminary Evidence of Neural Target  
839 Engagement. *Schizophrenia Bulletin* 41, 1276-1284.
- 840 Ruf, S.P., Fallgatter, A.J., Plewnia, C., 2017. Augmentation of working memory training by  
841 transcranial direct current stimulation (tDCS). *Scientific Reports* 7, 876.
- 842 Sala, G., Gobet, F., 2018. Cognitive Training Does Not Enhance General Cognition. *Trends*  
843 *in Cognitive Sciences.*
- 844 Schaapsmeeders, P., Maaijwee Na Fau - van Dijk, E.J., van Dijk Ej Fau - Rutten-Jacobs,  
845 L.C.A., Rutten-Jacobs Lc Fau - Arntz, R.M., Arntz Rm Fau - Schoonderwaldt, H.C.,  
846 Schoonderwaldt Hc Fau - Dorresteyn, L.D.A., Dorresteyn Ld Fau - Kessels, R.P.C., Kessels  
847 Rp Fau - de Leeuw, F.-E., de Leeuw, F.E., 2013. Long-term cognitive impairment after first-  
848 ever ischemic stroke in young adults. *Stroke* 44.
- 849 Shipstead, Z., Hicks, K.L., Engle, R.W., 2012. Cogmed working memory training: Does the  
850 evidence support the claims? *Journal of Applied Research in Memory and Cognition* 1, 185-  
851 193.
- 852 Smith, S.M., Brady, J.M., 1997. SUSAN—A New Approach to Low Level Image Processing.  
853 *International Journal of Computer Vision* 23, 45-78.
- 854 Smith, S.M., Jenkinson, M., Woolrich, M.W., Beckmann, C.F., Behrens, T.E.J., Johansen-  
855 Berg, H., Bannister, P.R., De Luca, M., Drobnjak, I., Flitney, D.E., Niazzy, R.K., Saunders, J.,  
856 Vickers, J., Zhang, Y., De Stefano, N., Brady, J.M., Matthews, P.M., 2004. Advances in  
857 functional and structural MR image analysis and implementation as FSL. *NeuroImage* 23,  
858 Supplement 1, S208-S219.
- 859 Smith, S.M., Nichols, T.E., 2009. Threshold-free cluster enhancement: Addressing problems  
860 of smoothing, threshold dependence and localisation in cluster inference. *NeuroImage* 44, 83-  
861 98.
- 862 Specht, K., 2020. Current Challenges in Translational and Clinical fMRI and Future  
863 Directions. *Frontiers in psychiatry* 10, 924-924.

864 Spencer-Smith, M., Klingberg, T., 2015. Benefits of a Working Memory Training Program  
865 for Inattention in Daily Life: A Systematic Review and Meta-Analysis. *PLOS ONE* 10,  
866 e0119522.

867 Strobel, K., Engedal, K., 2008. MMSE-NR, Norsk revidert Mini Mental Status Evaluering.  
868 Book MMSE-NR, Norsk revidert Mini Mental Status Evaluering. Oslo: Nasjonal  
869 kompetansetjeneste i aldring og helse.

870 Subramaniam, K., Luks, T.L., Garrett, C., Chung, C., Fisher, M., Nagarajan, S., Vinogradov,  
871 S., 2014. Intensive cognitive training in schizophrenia enhances working memory and  
872 associated prefrontal cortical efficiency in a manner that drives long-term functional gains.  
873 *NeuroImage* 99, 281-292.

874 Synhaeve, N.E., Arntz Rm Fau - Maaijwee, N.A.M., Maaijwee Na Fau - Rutten-Jacobs,  
875 L.C.A., Rutten-Jacobs Lc Fau - Schoonderwaldt, H.C., Schoonderwaldt Hc Fau - Dorresteijn,  
876 L.D.A., Dorresteijn Ld Fau - de Kort, P.L.M., de Kort Pl Fau - van Dijk, E.J., van Dijk Ej Fau  
877 - de Leeuw, F.-E., de Leeuw, F.E., 2014. Poor long-term functional outcome after stroke  
878 among adults aged 18 to 50 years: Follow-Up of Transient Ischemic Attack and Stroke  
879 Patients and Unelucidated Risk Factor Evaluation (FUTURE) study. *Stroke* 45.  
880 Team, R.C., 2013. R: A language and environment for statistical  
881 computing

882 Teasell, R.W., 1992. Long-Term Sequelae of Stroke: How should you handle stroke  
883 complications? *Canadian Family Physician* 38, 381-388.

884 Ulrichsen, K.M., Alnæs, D., Kolskår, K.K., Richard, G., Sanders, A.M., Dørum, E.S., Ihle-  
885 Hansen, H., Pedersen, M.L., Tornås, S., Nordvik, J.E., Westlye, L.T., 2019. Dissecting the  
886 cognitive phenotype of post-stroke fatigue using drift diffusion modeling of sustained  
887 attention. *bioRxiv* 582502.

888 von Bastian, C.C., Oberauer, K., 2014. Effects and mechanisms of working memory training:  
889 a review. *Psychological Research* 78, 803-820.

890 Weicker, J., Villringer, A., Thöne-Otto, A., 2016. Can impaired working memory functioning  
891 be improved by training? A meta-analysis with a special focus on brain injured patients.  
892 *Neuropsychology* 30, 190-212.

893 Westerberg, H., Jacobaeus, H., Hirvikoski, T., Clevberger, P., Östensson, M.L., Bartfai, A.,  
894 Klingberg, T., 2007. Computerized working memory training after stroke—A pilot study.  
895 *Brain Injury* 21, 21-29.

896 Wolak, M.E., Fairbairn, D.J., Paulsen, Y.R., 2012. Guidelines for Estimating Repeatability.  
897 *Methods in Ecology and Evolution* 3.

898 Woolrich, M.W., Ripley, B.D., Brady, M., Smith, S.M., 2001. Temporal Autocorrelation in  
899 Univariate Linear Modeling of fMRI Data. *NeuroImage* 14, 1370-1386.

900 Yamasaki, T., Ogawa, A., Osada, T., Jimura, K., Konishi, S., 2018. Within-Subject  
901 Correlation Analysis to Detect Functional Areas Associated With Response Inhibition.  
902 *Frontiers in Human Neuroscience* 12, 208.

903 Yang, S., Jiang, C., Ye, H., Tao, J., Huang, J., Gao, Y., Lin, Z., Chen, L., 2014. Effect of  
904 integrated cognitive therapy on hippocampal functional connectivity patterns in stroke  
905 patients with cognitive dysfunction: a resting-state fMRI study. *Evidence-based*  
906 *complementary and alternative medicine : eCAM* 2014, 962304-962304.

907 Ziemus, B., Baumann, O., Luerding, R., Schlosser, R., Schuierer, G., Bogdahn, U., Greenlee,  
908 M.W., 2007. Impaired working-memory after cerebellar infarcts paralleled by changes in  
909 BOLD signal of a cortico-cerebellar circuit. *Neuropsychologia* 45, 2016-2024.

910 Zinn, S., Bosworth, H.B., Hoenig, H.M., Swartzwelder, H.S., 2007. Executive Function  
911 Deficits in Acute Stroke. *Archives of Physical Medicine and Rehabilitation* 88, 173-180.

912 Alnæs, D., Sneve, M.H., Espeseth, T., Endestad, T., van de Pavert, S.H.P., Laeng, B., 2014.  
913 Pupil size signals mental effort deployed during multiple object tracking and predicts brain  
914 activity in the dorsal attention network and the locus coeruleus. *Journal of Vision* 14, 1-1.

915 Boggio, P.S., Nunes, A., Rigonatti, S.P., Nitsche, M.A., Pascual-Leone, A., Fregni, F., 2007.  
916 Repeated sessions of noninvasive brain DC stimulation is associated with motor function  
917 improvement in stroke patients. *Restorative neurology and neuroscience* 25, 123-129.  
918 Dørum, E.S., Alnæs, D., Kaufmann, T., Richard, G., Lund, M.J., Tønnesen, S., Sneve, M.H.,  
919 Mathiesen, N.C., Rustan, Ø.G., Gjertsen, Ø., Vatn, S., Fure, B., Andreassen, O.A., Nordvik,  
920 J.E., Westlye, L.T., 2016. Age-related differences in brain network activation and co-  
921 activation during multiple object tracking. *Brain and Behavior* 6, e00533.  
922 Marquez, J., van Vliet, P., McElduff, P., Lagopoulos, J., Parsons, M., 2013. Transcranial  
923 Direct Current Stimulation (tDCS): Does it Have Merit in Stroke Rehabilitation? A  
924 Systematic Review. *International Journal of Stroke* 10, 306-316.  
925 Olesen, P.J., Westerberg, H., Klingberg, T., 2004. Increased prefrontal and parietal activity  
926 after training of working memory. *Nature Neuroscience* 7, 75-79.  
927 Park, J., Oh, Y., Chung, K., Kim, K.J., Kim, C.O., Park, J.Y., 2019. Effect of home-based  
928 transcranial direct current stimulation (tDCS) on cognitive function in patients with mild  
929 cognitive impairment: a study protocol for a randomized, double-blind, cross-over study.  
930 *Trials* 20, 278.  
931 Pylyshyn, Z.W., Strom, R.W., 1988. Tracking multiple independent targets: Evidence for a  
932 parallel tracking mechanism\*. *Spatial Vision* 3, 179-197.  
933 Richard, G., Kolskår, K., Ulrichsen, K., Kaufmann, T., Alnæs, D., Sanders, A.-M., Dørum,  
934 E., Sánchez, J.M., Petersen, A., Ihle-Hansen, H., Nordvik, J.E., Westlye, L., 2019. Reliable  
935 longitudinal brain age prediction in stroke patients: Associations with cognitive function and  
936 response to cognitive training. *bioRxiv*.  
937 Richard, G., Kolskår, K., Ulrichsen, K.M., Kaufmann, T., Alnæs, D., Sanders, A.-M., Dørum,  
938 E.S., Monereo Sánchez, J., Petersen, A., Ihle-Hansen, H., Nordvik, J.E., Westlye, L.T., 2020.  
939 Brain age prediction in stroke patients: Highly reliable but limited sensitivity to cognitive  
940 performance and response to cognitive training. *NeuroImage: Clinical* 25, 102159.  
941 Team, R., 2016. RStudio: Integrated Development Environment for R. RStudio, Inc.  
942 Walle, K.M., Nordvik, J.A.-O.X., Espeseth, T., Becker, F., Laeng, B., 2019. Multiple object  
943 tracking and pupillometry reveal deficits in both selective and intensive attention in unilateral  
944 spatial neglect. *J Clin Exp Neuropsychol.* 41, 270-289.  
945 Winkler, A.M., Ridgway, G.R., Webster, M.A., Smith, S.M., Nichols, T.E., 2014.  
946 Permutation inference for the general linear model. *NeuroImage* 92, 381-397.  
947 Yun, G.J., Chun, M.H., Kim, B.R., 2015. The Effects of Transcranial Direct-Current  
948 Stimulation on Cognition in Stroke Patients. *J Stroke* 17, 354-358.  
949

950  
951  
952  
953  
954
